# Supplementary material for: Geoscientific Characterization and Interpretation (Geosynthesis) within the Preliminary Safety Assessment in the German Site-Selection Procedure for a High-level Nuclear Waste Repository
Source: Copernicus journal article supplement (doi:10.5194/sand-1-45-2021), 2021-11-10
Supplement: Supplementary file 2 [file sand-1-45-2021-supplement.zip]

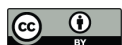

*Supplement of*

## **Geoscientific Characterization and Interpretation (Geosynthesis) within the Preliminary Safety Assessment in the German Site-Selection Procedure for a High-level Nuclear Waste Repository**

**Sönke Reiche et al.**

*Correspondence to:* Sönke Reiche ([soenke.reiche@bge.de](mailto:soenke.reiche@bge.de))

The copyright of individual parts of the supplement might differ from the article licence.
