# Supplementary material for: Geoscientific Characterization and Interpretation (Geosynthesis) within the Preliminary Safety Assessment in the German Site-Selection Procedure for a High-level Nuclear Waste Repository
Source: Copernicus journal article supplement (doi:10.5194/sand-1-45-2021), 2021-11-10
Supplement: Supplementary file 3 [file sand-1-45-2021-supplement.zip]

Archive with 2 entries (2 files):
- sand-2021-111-supplement-version1.pdf
- sand-1-45-2021-supplement-title-page.pdf
